# Supplementary material for: A Cu2+-selective colorimetric-fluorometric sensor based on an anthracenyl-modified oxacalix[4]arene
Source: Royal Society of Chemistry journal article supplement (doi:10.1039/d1nj04034k), 2021-01-01
Supplement: d1nj04034k1.pdf [file d1nj04034k1.pdf]

## Electronic Supplementary Information

# A Cu<sup>2+</sup>-selective colorimetric-fluorometric sensor based on an anthracenyl-modified oxacalix[4]arene

Shao-Guang Wang<sup>a</sup>, Yu Pang<sup>b</sup>, Min Xue<sup>b</sup>, and Yong Yang<sup>a, \*</sup>

<sup>a</sup> Department of Chemistry, Key Laboratory of Surface & Interface Science of Polymer Materials of Zhejiang Province,

Zhejiang Sci-Tech University, Hangzhou 310018, China

<sup>b</sup> Department of Physics, Zhejiang Sci-Tech University, Hangzhou 310018, China

### Table of Contents

|                                                                                             |     |
|---------------------------------------------------------------------------------------------|-----|
| Table of Contents.....                                                                      | S1  |
| 1. General Information for Synthesis, Characterization and Spectroscopy Measurements .....  | S2  |
| 2. Synthetic Details and Characterization Data for New Compounds .....                      | S2  |
| 3. Control Experiments with <b>AP</b> .....                                                 | S5  |
| 4. Determination of the Limit of Detection .....                                            | S7  |
| 5. Job Plots for Complex <b>AO</b> -Cu <sup>2+</sup> using UV-vis and FL Measurements ..... | S8  |
| 6. The Nonlinear Fitting Equation for the 1:1 Binding Mode Using FL Titration Data .....    | S10 |
| 7. Interference Studies .....                                                               | S11 |
| 8. Protocol to analyze Cu <sup>2+</sup> in aqueous samples.....                             | S12 |
| 9. Reference .....                                                                          | S12 |

---

\* Corresponding author.  
E-mail address: yangyong@zstu.edu.cn

## 1. General Information for Synthesis, Characterization and Spectroscopy Measurements

All solvents for reactions and column chromatography were used directly as received.  $^1\text{H}$  and  $^{13}\text{C}$  NMR spectra were recorded on a Bruker AV 400 MHz and 100 MHz instruments. Chemical shifts were expressed in parts per million ( $\delta$ : ppm) TMS ( $\delta = 0$  ppm) as an internal standard. Coupling constants ( $J$  values) were given in hertz (Hz). HRMS analysis was performed using a MALDI-TOF or ESI mass spectrometer.

Commercial  $\text{CHCl}_3$  was first washed with deionized water three times and then dried over anhydrous  $\text{Na}_2\text{SO}_4$ . Fresh  $\text{CHCl}_3$  was distilled from  $\text{P}_2\text{O}_5$  before spectroscopic measurements.  $\text{CH}_3\text{CN}$  for spectroscopy measurement was distilled. UV-vis spectra and the fluorescent emission spectra were recorded on an Olis DSM 172 spectrophotometer. 10 mm  $\times$  10 mm cuvettes were used. Usually, data were collected at 1 nm intervals. The slitwidth was fixed at 2.5 mm and the integration time was set as 0.1 s. High resolution mass spectra (HRMS) analysis was performed with a Waters Xevo G2-S Q-TOF mass spectrometer.

The chemicals were used directly as purchased from Energy Chemical Reagents, Aladdin Reagents, J&K Chemical Reagents.

## 2. Synthetic Details and Characterization Data for New Compounds

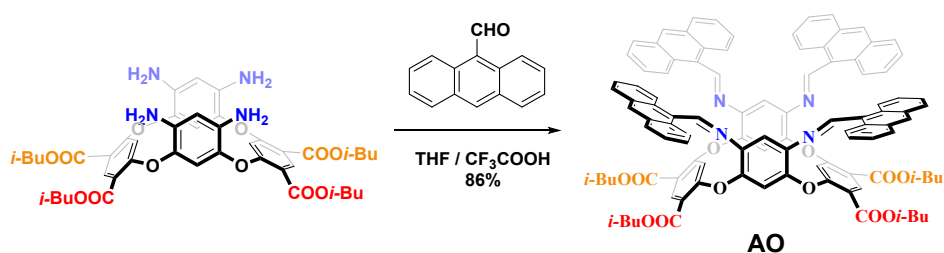

Tetraaminoxocalix[4]arene (0.33 g, 0.4 mmol, 1 equivalent) and 9-anthracaldehyde (0.34 g, 1.6 mmol, 4 equivalents) were dissolved in 20 mL anhydrous THF. Then catalytic amount of  $\text{CF}_3\text{COOH}$  was added to the reaction mixture. The reaction mixture was heated to reflux for 3 hours. After evaporation of solvent under reduced pressure, the residue was purified *via* column chromatography (silica gel,  $\text{CH}_2\text{Cl}_2$ : EtOAc = 30:1 as eluent). The product (0.54 g, 86%) was a yellow solid.

m. p.: 283–284  $^\circ\text{C}$ .

$^1\text{H}$  NMR (400 MHz,  $\text{CDCl}_3$  (passing through a  $\text{K}_2\text{CO}_3$  column before use), TMS, 298 K, ppm):  $\delta$  9.42 (s, 4H, Ar-*H*-anthracene), 8.96 (s, 2H, Ar-*H*), 8.25 (d,  $J = 8.3$  Hz, 8H, Ar-*H*-anthracene), 7.85 (s, 4H, N=CH), 7.45–7.37 (m, 8H, Ar-*H*-anthracene), 7.27 (s, 2H, Ar-*H*), 7.16 (s, 2H, Ar-*H*), 7.00–6.85 (m, 16H, Ar-*H*-anthracene), 6.25 (s, 2H, Ar-*H*), 4.13 (d,  $J = 6.4$  Hz, 8H,  $\text{COOCH}_2$ ), 2.10–1.90 (m, 4H, CH), 0.97–0.92 (m, 24H,  $\text{CH}_3$ ).

$^{13}\text{C}$  NMR (75 MHz,  $\text{CDCl}_3$  (passing through a  $\text{K}_2\text{CO}_3$  column before use), TMS, 298 K, ppm):  $\delta$  164.5, 163.6, 163.3, 146.9, 143.5, 138.1, 131.4, 130.13, 130.06, 128.5, 126.8, 124.6, 123.9, 123.5, 119.2, 113.2, 112.7, 101.7, 71.3, 27.9, 19.2.

HRMS (ESI $^+$ ) calcd. for  $[\text{C}_{104}\text{H}_{84}\text{N}_4\text{O}_{12} + \text{H}]^+$  1581.6159, found: 1581.6210.

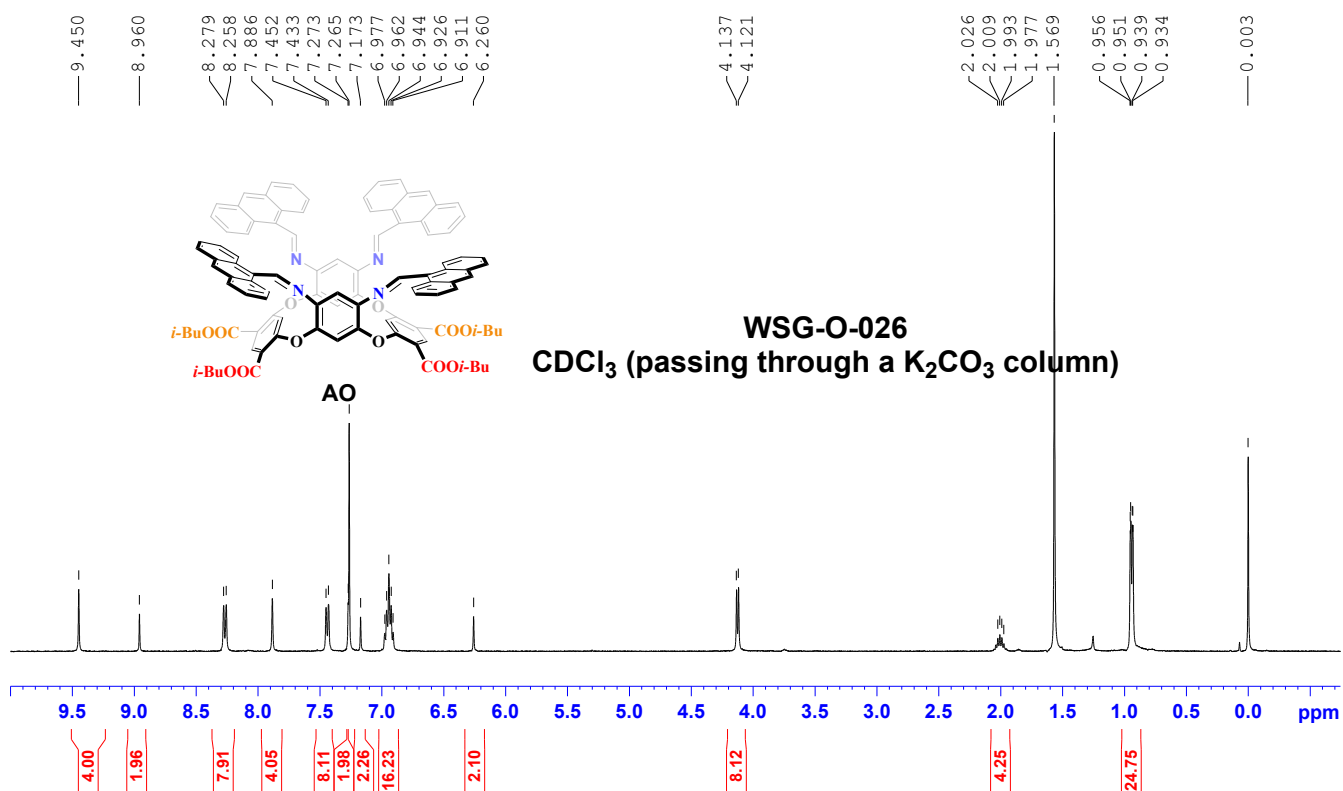

Figure S1. <sup>1</sup>H NMR spectrum of compound AO, CDCl<sub>3</sub>, 298 K, 400 MHz.

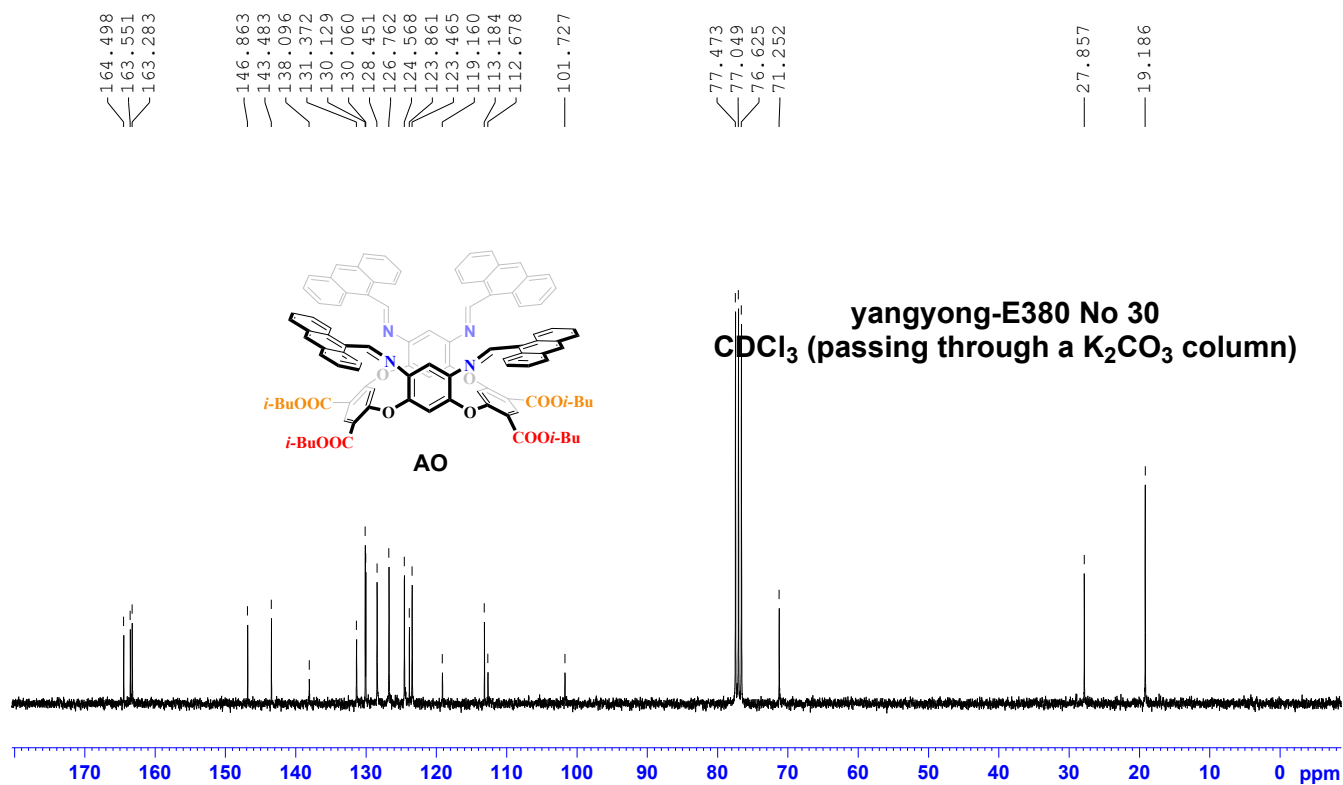

Figure S2. <sup>13</sup>C NMR spectrum of compound AO, CDCl<sub>3</sub>, 298 K, 75 MHz.

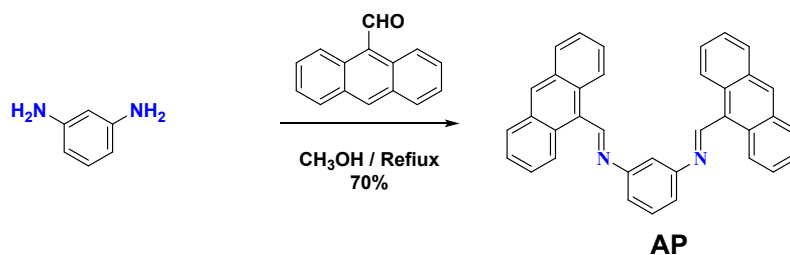

A mixture of 1, 3-phenylenediamine (0.05 g, 0.5 mmol) and 9-anthraldehyde (0.21 g, 1.0 mmol) in 40 mL anhydrous CH<sub>3</sub>OH was heated to reflux for 15 min. The hot solution was filtered. The filtrate was left to cool down to 5 °C. Upon standing for 15 hours, the precipitated yellow solid (0.17 g, 70%) was collected by filtration and washed with CH<sub>3</sub>OH.

m. p.: 207–208 °C.

<sup>1</sup>H NMR (400 MHz, CDCl<sub>3</sub>, TMS, 298 K, ppm): δ 9.83 (s, 2H, Ar-*H*-anthracene), 8.83 (d, *J* = 8.7 Hz, 4H, Ar-*H*-anthracene), 8.60 (s, 2H, CH=N), 8.08 (d, *J* = 8.2 Hz, 4H, Ar-*H*-anthracene), 7.65-7.50 (m, 10H, Ar-*H*-anthracene and Ar-*H*), 7.41 (dd, *J* = 7.8 Hz, *J* = 2.0 Hz, 2H, Ar-*H*).

<sup>13</sup>C NMR (100 MHz, CDCl<sub>3</sub>, TMS, 298 K, ppm): δ 160.4, 153.8, 131.4, 131.0, 130.8, 130.2, 129.1, 127.4, 127.1, 125.5, 124.8, 119.0, 113.6.

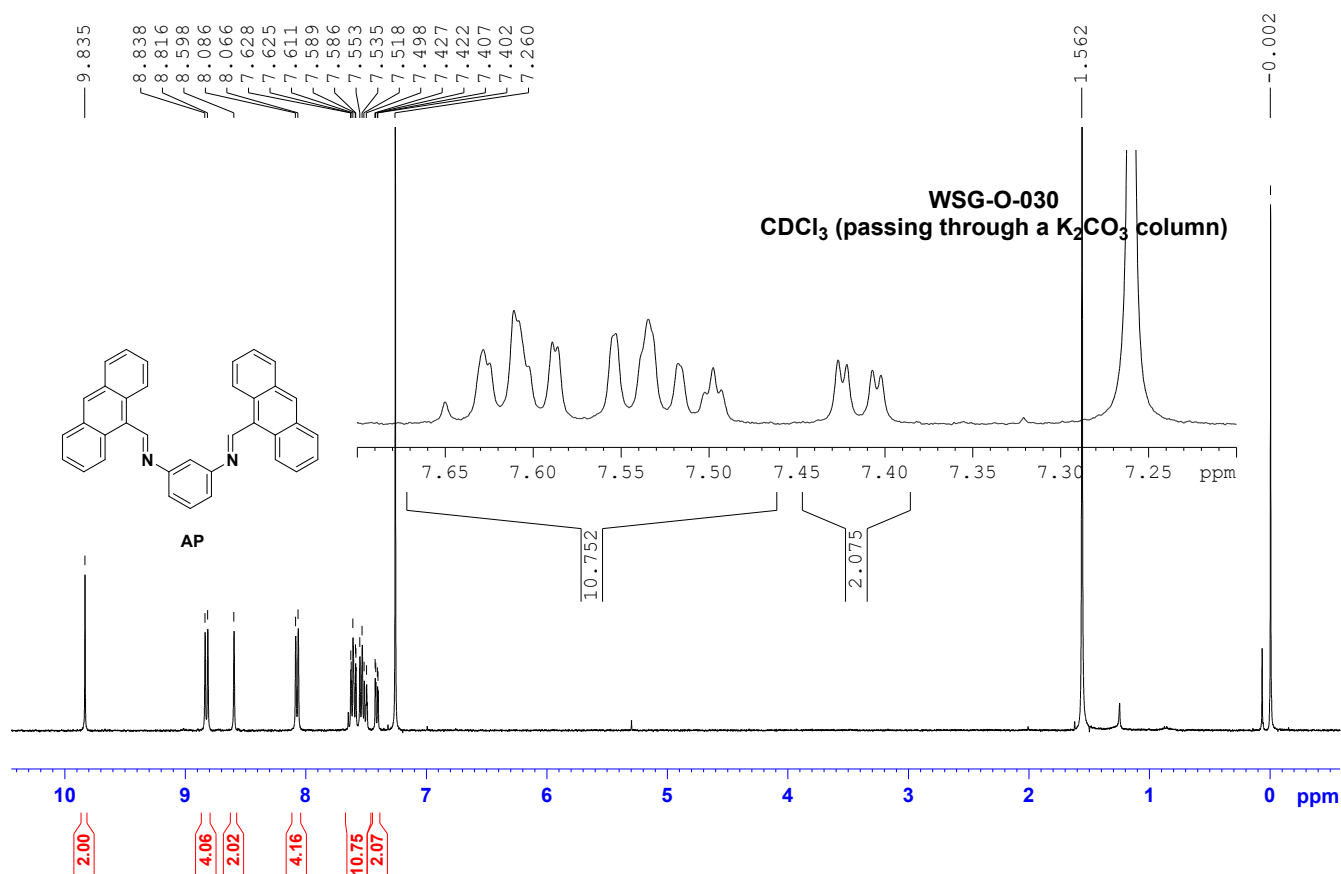

Figure S3. <sup>1</sup>H NMR spectrum of compound AP, CDCl<sub>3</sub>, 298 K, 400 MHz.

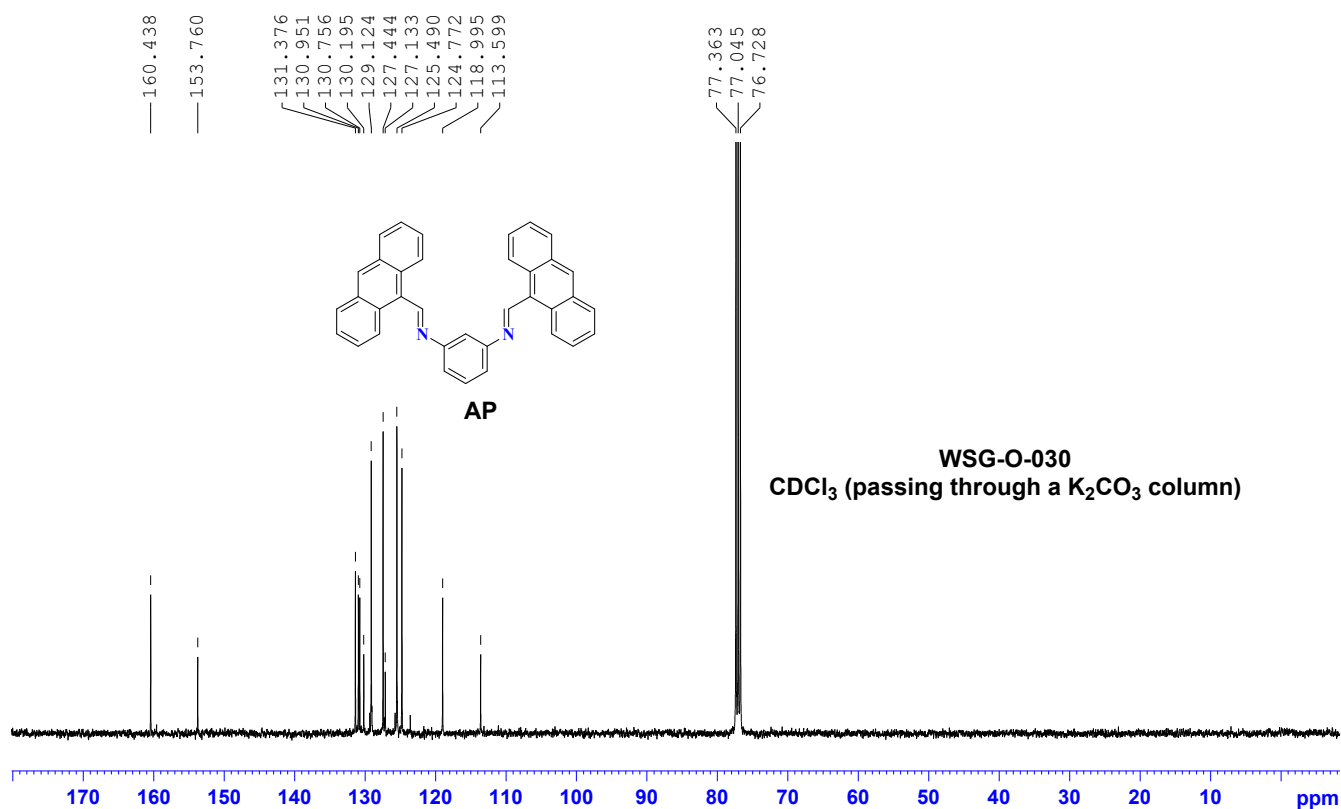

Figure S4. <sup>13</sup>C NMR spectrum of compound AP, CDCl<sub>3</sub>, 298 K, 100 MHz.

### 3. Control Experiments with AP

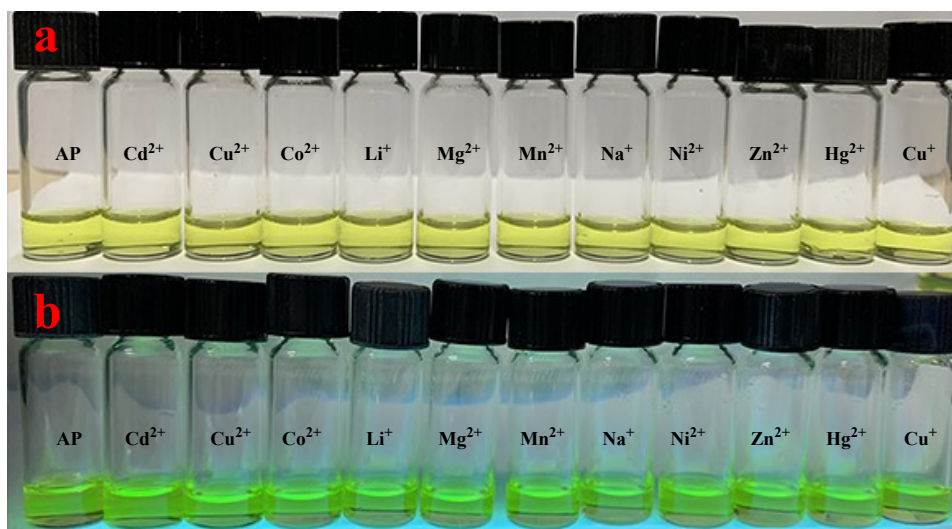

Figure S5. Photographs of AP ( $2 \times 10^{-5}$  M) upon addition of 2.5 equivalents of various metal ions in CH<sub>3</sub>CN-CHCl<sub>3</sub> solution (1:1, v/v), (a) under natural light, and (b) under UV lamp  $\lambda = 365$  nm.

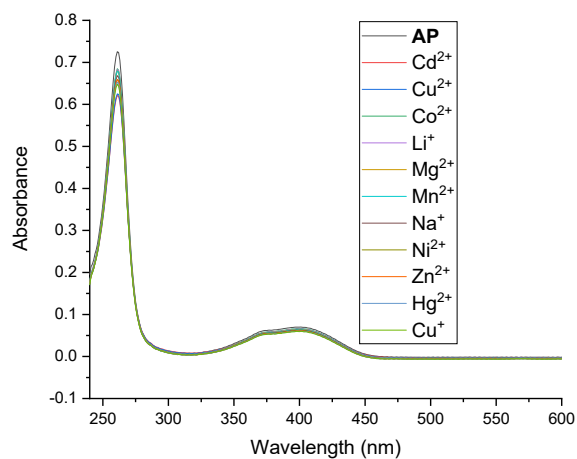

Figure S6. UV-vis absorption spectra of AP ( $2 \times 10^{-5}$  M) in the absence and presence of Cd<sup>2+</sup>, Cu<sup>2+</sup>, Co<sup>2+</sup>, Li<sup>+</sup>, Mg<sup>2+</sup>, Mn<sup>2+</sup>, Na<sup>+</sup>, Ni<sup>2+</sup>, Zn<sup>2+</sup>, Hg<sup>2+</sup>, Cu<sup>+</sup> (each 2.5 equivalents) in CH<sub>3</sub>CN–CHCl<sub>3</sub> solution (1:1, v/v).

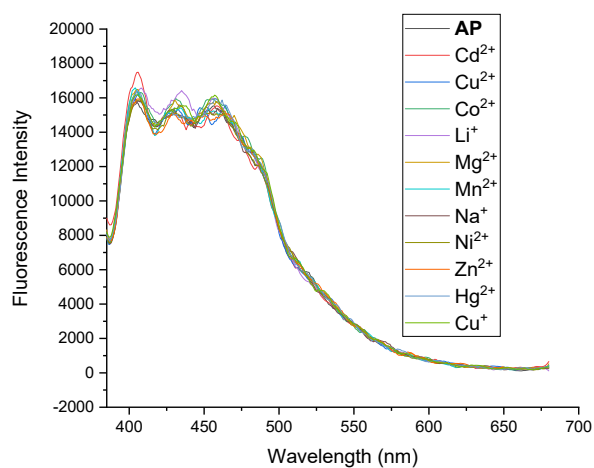

Figure S7. FL emission spectra for AP ( $2 \times 10^{-5}$  M) in the absence and presence of Cd<sup>2+</sup>, Cu<sup>2+</sup>, Co<sup>2+</sup>, Li<sup>+</sup>, Mg<sup>2+</sup>, Mn<sup>2+</sup>, Na<sup>+</sup>, Ni<sup>2+</sup>, Zn<sup>2+</sup>, Hg<sup>2+</sup>, Cu<sup>+</sup> (each 2.5 equivalents) in CH<sub>3</sub>CN–CHCl<sub>3</sub> solution (1:1, v/v),  $\lambda_{\text{ex}} = 365$  nm.

#### 4. Determination of the Limit of Detection

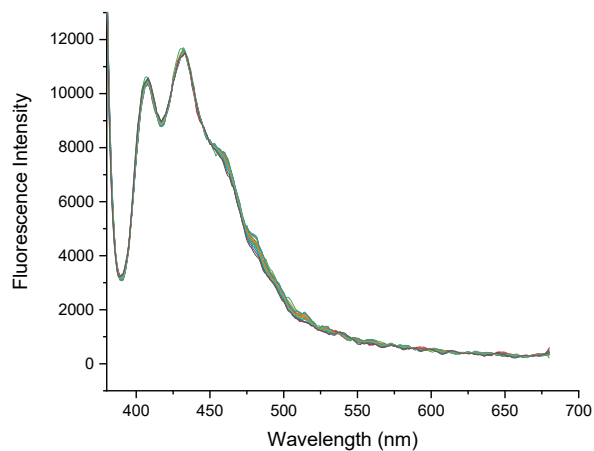

Figure S8. Twenty scans of fluorescence emission spectra of **AO** ( $2 \times 10^{-5}$  M) in  $\text{CH}_3\text{CN}-\text{CHCl}_3$  solution (1:1, v/v),  $\lambda_{\text{ex}} = 365$  nm. The standard deviation of the FL intensity data at  $\lambda = 490$  nm was 112.9. The limit of detection (LOD) was calculated based on the following equation.

$$\text{Limit of Detection (LOD)} = \frac{3\sigma}{K} = 3 \times \frac{112.9}{2.5 \times 10^9 \text{ M}^{-1}} = 1.4 \times 10^{-7} \text{ M} \quad (\text{Eq. S1})$$

$\sigma$ : the standard deviation for FL intensity of AO solution at  $\lambda = 490$  nm

$K$ : the slope of the plot of changes in FL intensity at  $\lambda = 490$  nm vs  $[\text{Cu}^{2+}]$

## 5. Job Plots for Complex AO-Cu<sup>2+</sup> using UV-vis and FL Measurements

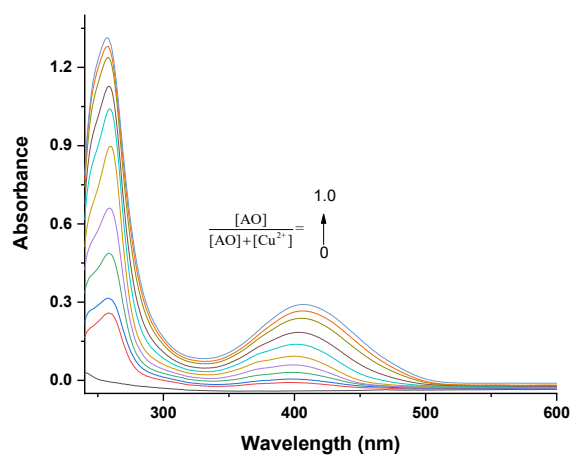

Figure S9. UV-vis spectra of mixtures of **AO** and Cu<sup>2+</sup> with different ratios in CH<sub>3</sub>CN-CHCl<sub>3</sub> solution (1:1, v/v). The total concentration was fixed at  $2 \times 10^{-5}$  M.

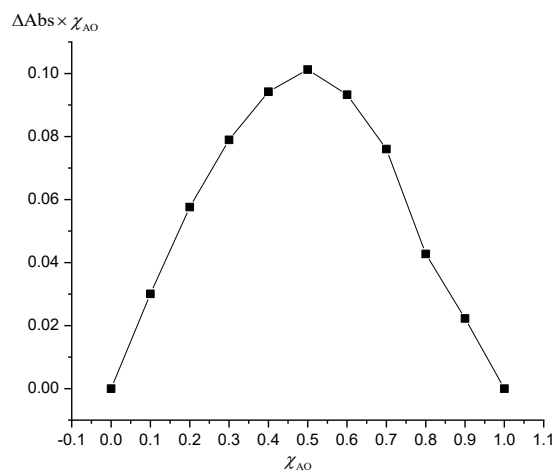

Figure S10. Job plot for the complex between **AO** and Cu<sup>2+</sup> in CH<sub>3</sub>CN-CHCl<sub>3</sub> solution (1:1, v/v), using UV-vis absorption values at  $\lambda = 408$  nm, showing a 1:1 stoichiometry.



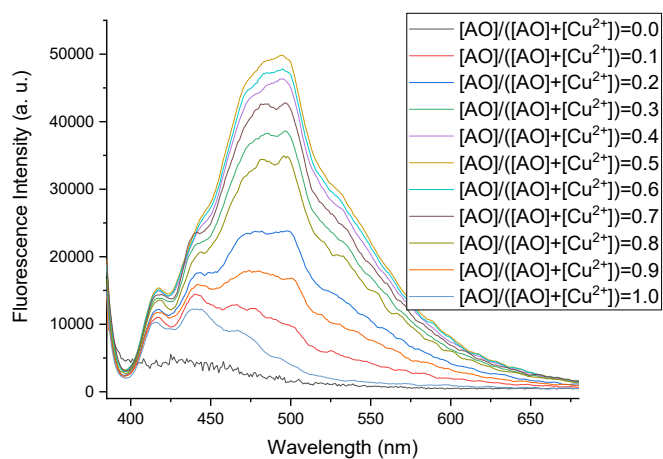

Figure S11. Fluorescence spectrum of mixtures of **AO** and  $\text{Cu}^{2+}$  with different ratios in  $\text{CH}_3\text{CN}-\text{CHCl}_3$  solution (1:1, v/v). The total concentration was fixed at  $2 \times 10^{-5}$  M,  $\lambda_{\text{ex}} = 365$  nm.

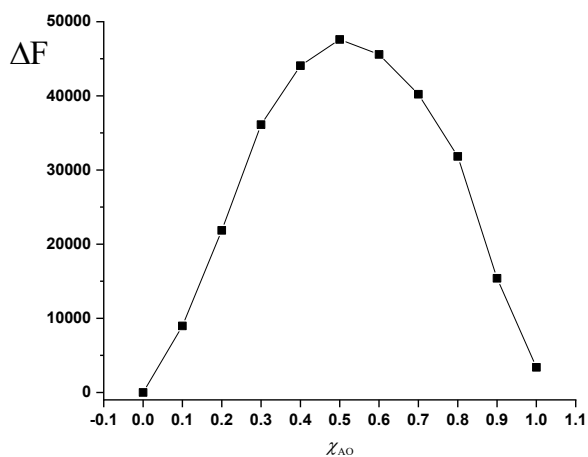

Figure S12. Job plot for the complex between **AO** and  $\text{Cu}^{2+}$  in  $\text{CH}_3\text{CN}-\text{CHCl}_3$  solution (1:1, v/v), using fluorescence intensity values at  $\lambda = 490$  nm, showing a 1:1 stoichiometry.

## 6. The Nonlinear Fitting Equation for the 1:1 Binding Mode Using FL Titration Data

The nonlinear fitting equation for determination of association constant ( $K_a$ ) of **AO**-Cu<sup>2+</sup> complex was based on the following 1:1 bind mode. The FL intensities at  $\lambda = 490$  nm was used for fitting. <sup>S1</sup>

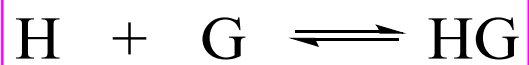

$$K_a = \frac{[\text{HG}]}{[\text{H}][\text{G}]}$$

$$[\text{H}] = [\text{H}]_0 - [\text{HG}]$$

$$[\text{G}] = [\text{G}]_0 - [\text{HG}]$$

$$[\text{HG}] = \frac{[\text{G}]_0 + [\text{H}]_0 + \frac{1}{K_a} - \sqrt{([\text{G}]_0 + [\text{H}]_0 + \frac{1}{K_a})^2 - 4[\text{G}]_0[\text{H}]_0}}{2}$$

$$F = k_H[\text{H}] + k_{\text{HG}}[\text{HG}]$$

$$= k_H([\text{H}]_0 - [\text{HG}]) + k_{\text{HG}}[\text{HG}]$$

$$= k_H[\text{H}]_0 + (k_{\text{HG}} - k_H)[\text{HG}] \quad F_0 = k_H[\text{H}]_0$$

$$F - F_0 = (k_{\text{HG}} - k_H)[\text{HG}]$$

$$\Delta F = F - F_0 \quad C = k_{\text{HG}} - k_H$$

$$\Delta F = C \frac{[\text{G}]_0 + [\text{H}]_0 + \frac{1}{K_a} - \sqrt{([\text{G}]_0 + [\text{H}]_0 + \frac{1}{K_a})^2 - 4[\text{G}]_0[\text{H}]_0}}{2}$$

$[\text{H}]_0$ : the initial concentration of Host

$[\text{H}]$ : the concentration of free Host

$[\text{G}]_0$ : the initial concentration of Guest

$[\text{G}]$ : the concentration of free Guest

$[\text{HG}]$ : the concentration of Host-Guest complex

$K_a$ : association constant

$k_H$ : coefficient

$k_{\text{HG}}$ : coefficient

$F_0$ : the initial FL intensity of Host

$F$ : FL intensity for each titration

$\Delta F$ : changes of the FL intensity

$C$ : constant

## 7. Interference Studies

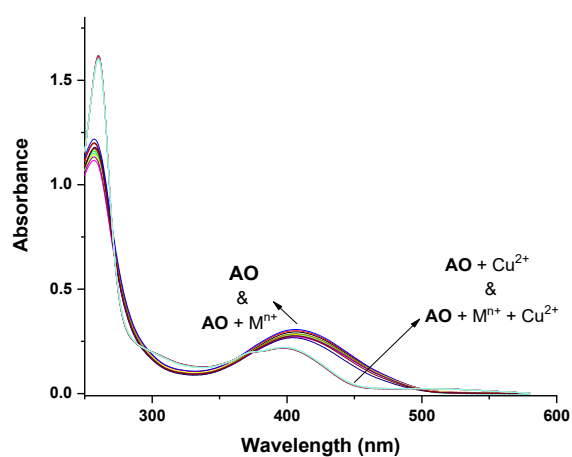

Figure S13. UV-vis spectra of **AO** ( $2 \times 10^{-5}$  M) with various metal ions M<sup>n+</sup>: Cd<sup>2+</sup>, Co<sup>2+</sup>, Li<sup>+</sup>, Mg<sup>2+</sup>, Mn<sup>2+</sup>, Na<sup>+</sup>, Ni<sup>2+</sup>, Zn<sup>2+</sup>, Hg<sup>2+</sup>, Cu<sup>+</sup> (25 equivalents) in the absence and presence of Cu<sup>2+</sup> (2.5 equivalents) in CH<sub>3</sub>CN-CHCl<sub>3</sub> solution (1:1, v/v).

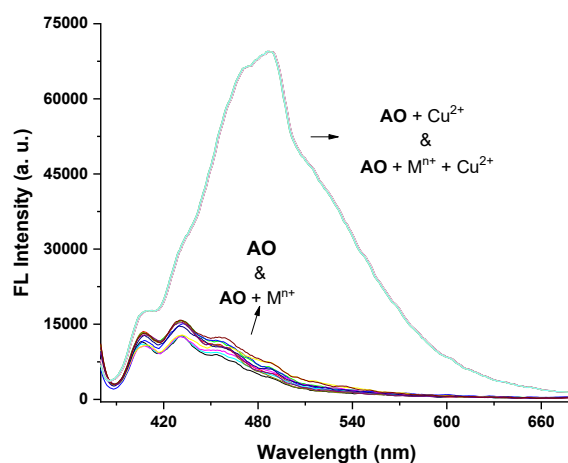

Figure S14. FL emission spectra of **AO** ( $2 \times 10^{-5}$  M) with various metal ions M<sup>n+</sup>: Cd<sup>2+</sup>, Co<sup>2+</sup>, Li<sup>+</sup>, Mg<sup>2+</sup>, Mn<sup>2+</sup>, Na<sup>+</sup>, Ni<sup>2+</sup>, Zn<sup>2+</sup>, Hg<sup>2+</sup>, Cu<sup>+</sup> (25 equivalents) in the absence and presence of Cu<sup>2+</sup> (2.5 equivalents) in CH<sub>3</sub>CN-CHCl<sub>3</sub> solution (1:1, v/v),  $\lambda_{\text{ex}} = 365$  nm.

## 8. Protocol to analyze $\text{Cu}^{2+}$ in aqueous samples

Bulk solution of the sensor **AO** ( $1 \times 10^{-3}$  M) was prepared by dissolving **AO** (4.7 mg, 3.0  $\mu\text{mol}$ ) in 3 mL  $\text{CH}_3\text{CN}-\text{CHCl}_3$  solution (1:1, v/v). Bulk solution of  $\text{Cu}(\text{ClO}_4)_2$  ( $1 \times 10^{-3}$  M) was obtained by dissolving solid (1.1 mg, 3.0  $\mu\text{mol}$ ) in 3 mL water. In the following six parallel experiments, 60  $\mu\text{L}$  of **AO** solution and different volume (3  $\mu\text{L}$ , 9  $\mu\text{L}$ , 21  $\mu\text{L}$ , 36  $\mu\text{L}$ , 45  $\mu\text{L}$ , 60  $\mu\text{L}$ ) of the above  $\text{Cu}(\text{ClO}_4)_2$  solution were mixed in 3 mL  $\text{CH}_3\text{CN}-\text{CHCl}_3$  solution (1:1, v/v) and 3 mL water. Then the solutions were heated to reflux in sealed tubes for 24 h. Solvent was removed in vacuo and the solids were dried at 100  $^\circ\text{C}$  for 24 hours to remove all solvent. Each sample was prepared by dissolving the above dried solid in 3 mL  $\text{CH}_3\text{CN}-\text{CHCl}_3$  solution (1:1, v/v) and the fluorescence spectra were recorded (see below).

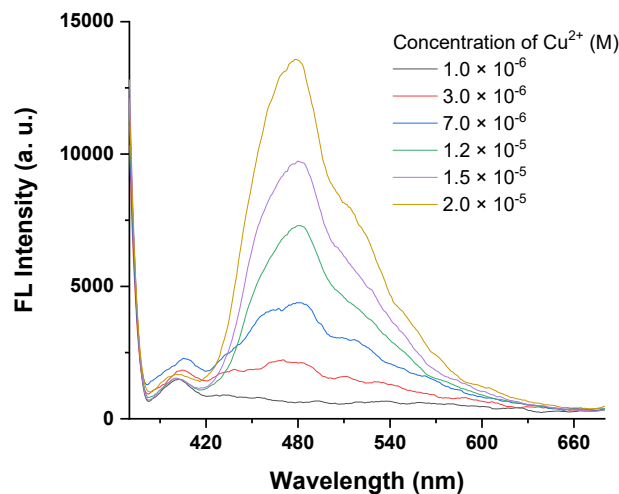

Figure S15. Fluorescence spectra of sensor **AO** ( $2 \times 10^{-5}$  M) and with varied concentration of  $\text{Cu}^{2+}$  from aqueous sample mixed in  $\text{CH}_3\text{CN}-\text{CHCl}_3$  solution (1:1, v/v),  $\lambda_{\text{ex}} = 365$  nm.

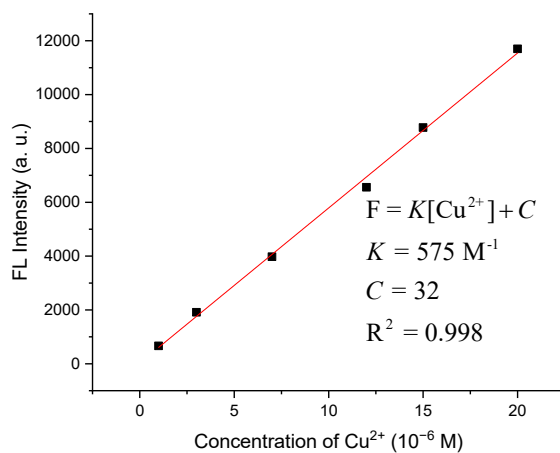

Figure S16. Linear fitting result of the fluorescence intensity data at  $\lambda = 490$  nm vs concentration of  $\text{Cu}^{2+}$ , demonstrating a linear response.

## 9. Reference

S1 P. Thordarson, Determining association constants from titration experiments in supramolecular chemistry, *Chem. Soc. Rev.*, 2011, **40**, 1305-1323.
